# Supplementary material
Source: PubMed Central journal article supplement (PMC5861819)
Supplement: AEM.02754-17_zam007188398s1.pdf [file AEM.02754-17_zam007188398s1.pdf]

# DETECTION OF HUMAN BOCAVIRUS SPECIES 2 AND 3 IN BIVALVE SHELLFISH IN ITALY - Giuseppina La Rosa et al., 2018

(Supplementary material)

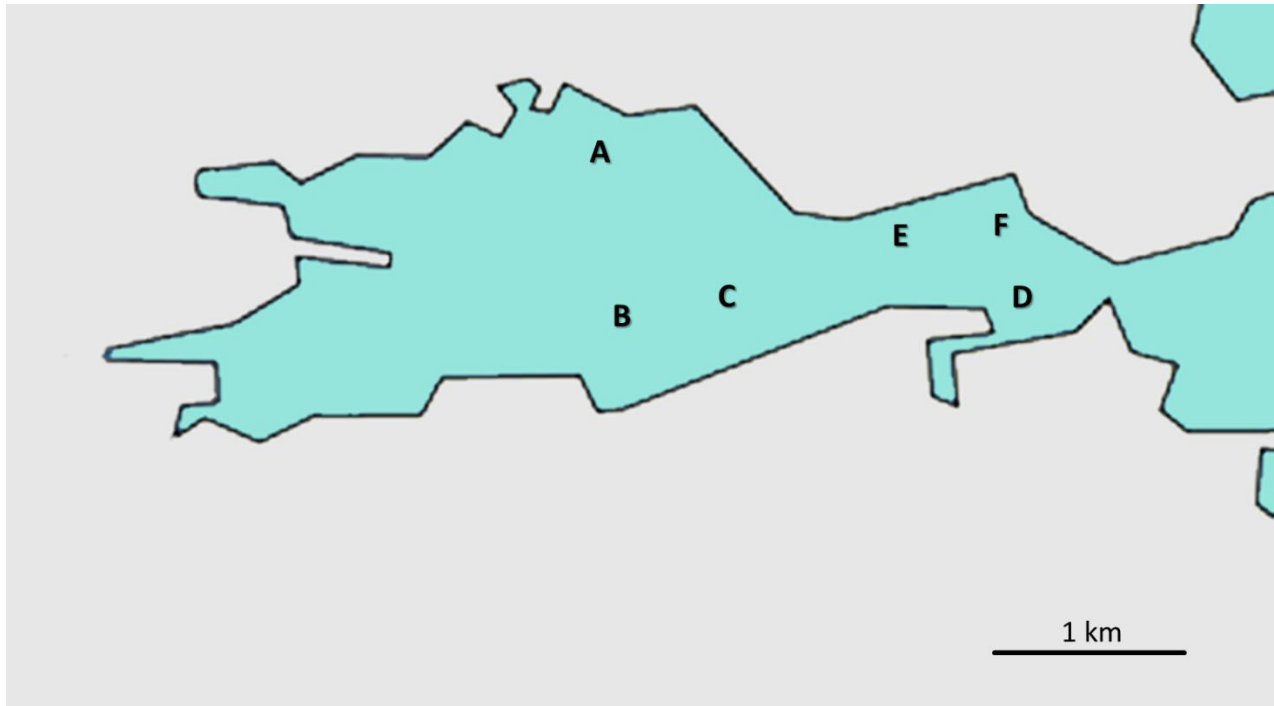

Additional samples taken in 2013 and 2015 from points B to F were included in the study following the detection of HBoV in samples taken from point A. Distances between sampling points ranged from 0.49 Km to 3.09 Km.

In detail:

| Year                            | Additional samples                  | Results                                               |
|---------------------------------|-------------------------------------|-------------------------------------------------------|
| 2013 (1 <sup>st</sup> sampling) | 4 samples (points B, C, D and F)    | detection of HBoV in all 4 samples                    |
| 2013 (2 <sup>nd</sup> sampling) | 4 samples (points B, C, D and F)    | detection of HBoV in all 4 samples                    |
| 2015                            | 5 samples (points B, C, D, E and F) | detection of HBoV in 4 samples (points B, C, D and E) |
